# Supplementary material
Source: Springer Nature journal article supplement (https://www.springermedizin.de/resource/supplementary/12913_2012_2365_MOESM1_ESM.pdf/9530542)

**(a) Surgical oncologist and dermatologist**

Alternating visits with surgical oncologist and dermatologist (at melanoma unit or local to patient), with shared arrangement ongoing for variable duration (e.g. 2-5 years).

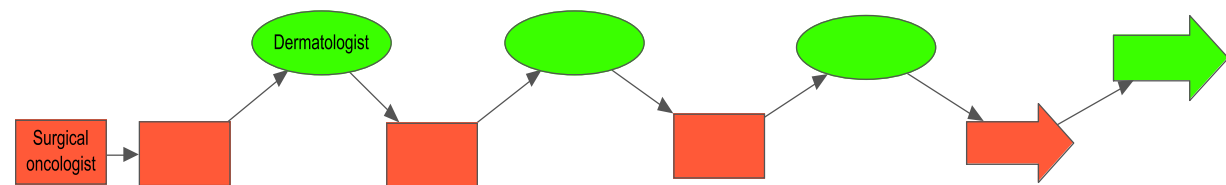

**(b) Dermatologist and local GP**

Dermatologist (at melanoma unit or local to patient) conducts ongoing follow-up; they may also share care with the patient's local / referring doctor (e.g. GP or skin cancer clinic).

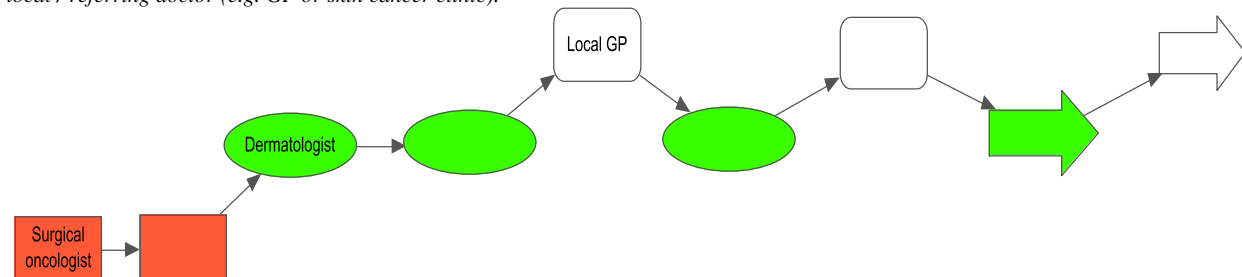

**(c) Surgical oncologist and local GP**

Alternating visits with surgical oncologist and patient's local / referring doctor (e.g. GP or skin cancer clinic), with variable duration of shared arrangements (from a few years to lifelong).

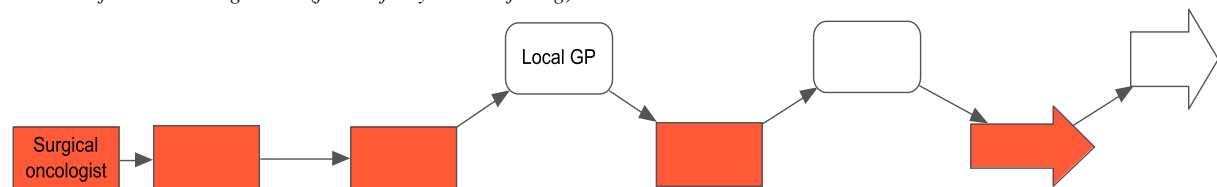

**(d) Melanoma unit GP and local GP**

Surgical oncologist referral to 'in-house' melanoma unit GP for ongoing follow-up; the latter may then also share care with patients local / referring doctor (e.g. family GP or skin cancer clinic)

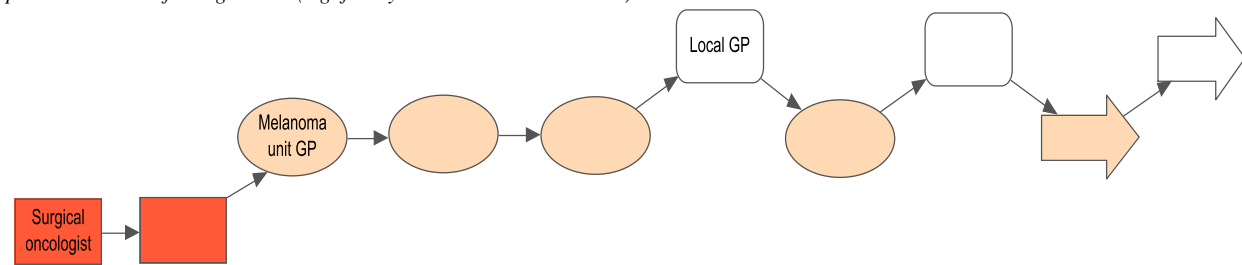

Supplement: MOESM1 [file 9530542]
